# Supplementary figures and images for: 3D TiO2/ZnO composite nanospheres as an excellent electron transport anode for efficient dye-sensitized solar cells
Source: Royal Society of Chemistry journal article supplement (doi:10.1039/c6ra04022e), 2016-01-01

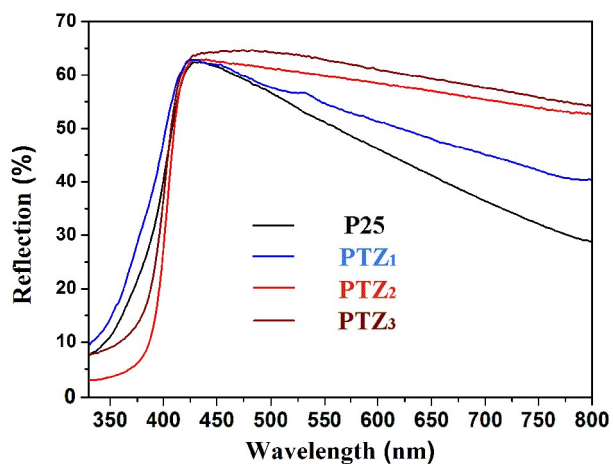

**Fig. S1** The UV-Vis reflection of four films without dye loading. — Film-1, — Film-2,  
— Film-3 and — Film-4.

Supplement: c6ra04022e1.pdf [file c6ra04022e1.pdf]
